# Supplementary material
Source: PubMed Central journal article supplement (PMC2083310)
Supplement: archdisch_adc.2005.087288_1.pdf [file archdisch_adc.2005.087288_1.pdf]

**Additional Material for online Publication**

**Appendix 1: Search Terms used**

| Database  | Search strategy or terms                                                                                                                                                                                                                                                                                                                                                                                                                                                                                                                                                                                                                                                                                                                                                                                                                                                                                                                                                                                                                                                                                                                                                                                                                                    | Total No. references screened |
|-----------|-------------------------------------------------------------------------------------------------------------------------------------------------------------------------------------------------------------------------------------------------------------------------------------------------------------------------------------------------------------------------------------------------------------------------------------------------------------------------------------------------------------------------------------------------------------------------------------------------------------------------------------------------------------------------------------------------------------------------------------------------------------------------------------------------------------------------------------------------------------------------------------------------------------------------------------------------------------------------------------------------------------------------------------------------------------------------------------------------------------------------------------------------------------------------------------------------------------------------------------------------------------|-------------------------------|
| Medline   | <p>[Questionnaires/ or focus groups/ or qualitative research/ or behavioral research/ or behavioral research/ or ethology/ or narration/ or interview\$.mp. or focus group\$.mp. or ethnopsycholog\$.mp. or attitude/ or attitude to health/ or child rearing/ or emotions/ or human characteristics/ or {personalit\$.mp. NOT disorder\$.mp.}]</p> <p>AND {{{grow#.mp. or (body adj2 size).mp. or body height/ or body mass index/ or body weight/ or head circumferenc#.mp.} AND {Infant/ or baby.mp. or infan#.mp. or Infant, Newborn/ or babies.mp. or newborn.mp. or neonat\$.mp.}} OR {fat adj2 baby).mp. or (thin adj2 baby).mp. or Infant, Low Birth Weight/ or Failure to Thrive/ or faltering growth.mp. or (fail\$ adj2 thrive\$.mp. or (falter\$ adj2 grow\$.mp.)}]</p>                                                                                                                                                                                                                                                                                                                                                                                                                                                                         | 1157                          |
| Psychinfo | <p>[[exp INFANT DEVELOPMENT/ or exp Mother Child Relations/ or exp Parents/ or exp Neonatal Development/ or (baby or babies).mp. or infan#.mp. or toddler#.mp. or newborn#.mp. or neonat#.mp.] AND {physical development/ or exp BODY SIZE/ or exp Body Weight/ or exp BODY HEIGHT/ or exp Obesity/ or bmi.mp. or body mass index.mp.}] OR [exp "OBESITY (ATTITUDES TOWARD)"/ or exp Failure to Thrive/ or (fat adj4 bab#.mp. or (thin adj4 bab#.mp. or (fat adj4 infan#.mp. or (thin adj4 infan#.mp. or failure to thrive.mp. or faltering growth.mp.</p> <p>AND [attitude measurement/ or attitude measures/ or personality measures/ or questionnaires/ or surveys/ or interviewers/ or interviewing/ or questioning/ or exp Conversation/ or exp Narratives/ or exp Discourse Analysis/ or exp Ethnology/ or exp Sociocultural Factors/ or exp Childrearing Practices/ or exp "Culture (Anthropological)"/ or exp Parental Attitudes/ or exp ANTHROPOLOGY/ or exp SOCIOLOGY/ or</p> <p>focus group#.mp. or interview#.mp. or ethno#.mp. or anthropolog#.mp. or sociolog#.mp. or attitud#.mp. or phenomonolog#.mp.</p>                                                                                                                                   | 425                           |
| Cinahl    | <p>{{(Focus Groups/ ) OR (focus group#.mp. ) OR (audiorecording/ or focus groups/ or interviews/ or narratives/ or observational methods/ or videorecording/ or vignettes/ or naturalistic inquiry/ ) OR (interview#.mp. ) OR (qualitative research.mp. ) OR (Qualitative Studies/ (9919)) OR (qualitative method#.mp. ) OR (behavioral research/ or ecological research/ or ethnographic research/ or ethnological research/ or grounded theory/ or phenomenological research/ ) OR (Narratives/ ) OR ( narrat#.mp. ) OR (ethno#.mp. ) OR (phenomenolog#.mp. ) OR (ethnopsychol#.mp. ) OR (attitude to health/ or attitude to illness/ or attitude to pregnancy/ or consumer attitudes/ ) OR (attitud#.mp. ) OR (child rearing/ or emotions/ ) OR ((personalit#.mp. ) NOT ((personalit# adj4 disorder#.mp. )))}</p> <p>AND {(Failure to Thrive/ (158) OR ((fail# adj2 thrive#.mp. ) OR (Parent-Child Relations/ ) OR (Infant Care/ ) OR ( (fat adj2 baby).mp. ) OR ((thin adj2 baby).mp. )]} OR [{"Body Weights and Measures"/ } OR ("GROWTH AND DEVELOPMENT ALTERATION (SABA HHCC)"/ or GROWTH/ or "GROWTH AND DEVELOPMENT (OMAHA)"/ )] AND ((Infant/ ) OR (Infant, Newborn/ ) OR (infan#.mp. ) OR (baby.mp. ) OR (babies.mp. ) OR ( toddler#.mp. )}]</p> | 457                           |
| ASSIA     | <p>(de=((body mass) or (height) or (weight) or (birth weight) or (underweight) or (weighing) or (size) or (growth) or (catch up growth) or (body mass index)))</p> <p>AND (de=((babies) or (low birth weight babies) or (newborn babies) or (premature babies) or (infancy)))</p>                                                                                                                                                                                                                                                                                                                                                                                                                                                                                                                                                                                                                                                                                                                                                                                                                                                                                                                                                                           | 428                           |

|                        |                                                                                                                                                                                                                                                                                                                                                                                                                                                                                                                                                                                                                                                                                                                                                                                                                                                                                                                                                                                                                                                                                                                                                                                                                                                                                                                                                                                      |     |
|------------------------|--------------------------------------------------------------------------------------------------------------------------------------------------------------------------------------------------------------------------------------------------------------------------------------------------------------------------------------------------------------------------------------------------------------------------------------------------------------------------------------------------------------------------------------------------------------------------------------------------------------------------------------------------------------------------------------------------------------------------------------------------------------------------------------------------------------------------------------------------------------------------------------------------------------------------------------------------------------------------------------------------------------------------------------------------------------------------------------------------------------------------------------------------------------------------------------------------------------------------------------------------------------------------------------------------------------------------------------------------------------------------------------|-----|
| Sociological Abstracts | <p>Search terms: "Body-Height" "Body-Image" "Body-Weight" "Size-" (size or weight or height or big or little or fat or thin or small or large) ( faltering growth) (failure to thrive)</p> <p>"Child-Development" "Infants-" "Parent-Child-Relations" (baby or babies or infant or infants) (baby or babies or infant or infants or toddler or toddlers) (size or weight or height or big or little or fat or thin or small or large or obese)</p> <p>"Interviews-" "Qualitative-Methods" "Phenomenology-" "Ethnography-" "Group-Research" "Discussion-" "Group-Research"</p>                                                                                                                                                                                                                                                                                                                                                                                                                                                                                                                                                                                                                                                                                                                                                                                                        | 109 |
| SIGLE                  | <p>Search terms:<br/>( faltering growth )or( failure to thrive ) (height or weight or size or bmi or body mass or small or large or big or little or obese or fat or thin) BODY-WEIGHT) (HEIGHT) (OBESE) (OBESITY) (SIZE-) (SIZE-AGE) (UNDERWEIGHT) (WEIGHING) (WEIGHSCALE) (WEIGHT)</p> <p>(baby or babies or infant or infants of toddler or toddlers) ( (BABY-) or (BABY-PRACTICE) (BABYCARE) (BABYFOOD) (INFANT) (INFANT-FEEDING) (INFANT-MOTHER) (INFANT-TODDLER) (INFANTE) (INFANTES) (INFANTI) (INFANTIL) (INFANTILE) (INFANTILES) (INFANTO) (INFANTS) (NEONATAL) (NEONATALE) (NEONATALEN) (NEONATALES) (NEONATALLY) (NEONATE) (NEONATEN) (NEONATES) (NEONATI) (NEONATO) (PERINATAL) (PERINATALE) (TODDLER) (TODDLER-AGE) (TODDLERS)</p>                                                                                                                                                                                                                                                                                                                                                                                                                                                                                                                                                                                                                                      | 39  |
| BNI & RCN              | <p>Search terms:<br/>(growth or size or weight or height) (BODY-WEIGHT) (BODYWEIGHT) (GROWTH) (GROWTH-DISORDERS) (GROWTH-ENHANCING) (HEIGHT) (SKINFOLD) (WEIGHT)</p> <p>(baby or babies or infant or infants) (BABY) (BABY-FEEDING) (BABY-MILK) (INFANT) (INFANT-CARE) (INFANT-CARER) (INFANT-FEEDING) (INFANT-FEEDING-PRACTICES) (INFANT-FOOD) (INFANT-MOTHER) (INFANT-NURSE) (INFANT-NUTRITION) (INFANT-PARENT) (INFANT-PARENTAL) (INFANT-RELATED) (INFANT-SCREENING) (INFANTE) (TODDLER) (TODDLER-PRESCHOOLER) (TODDLERHOOD) (TODDLERS)</p> <p>(qualitative or ethnographic or ethnopsychological or interview or interviews or interviewing or group or groups) (DISCUSSION) (DISCUSSIONS) (ETHNOGRAPH) (ETHNOGRAPHER) (ETHNOGRAPHIC) (ETHNOGRAPHICAL) (ETHNOGRAPHIES) (ETHNOGRAPHY) (ETHNOMETHODOLOGIC) (ETHNOMETHODOLOGICAL) (ETHNOMETHODOLOGY) (INTERVIEW) (INTERVIEWED) (INTERVIEWEES) (INTERVIEWER) (INTERVIEWERS) (INTERVIEWING) (INTERVIEWS) (INTERVIEWS-AND-INTERVIEWING) (NARRATE) (NARRATED) (NARRATING) (NARRATION) (NARRATIONAL) (NARRATIONS) (NARRATIVE) (NARRATIVE-CENTRED) (NARRATIVES) (PHENOMENOGRAPHIC) (PHENOMENOGRAPHY) (PHENOMENOLOGIC) (PHENOMENOLOGIC-HERMENEUTIC) (PHENOMENOLOGICAL) (PHENOMENOLOGICAL-HERMENEUTIC) or (PHENOMENOLOGIES) or (PHENOMENOLOGY) (QUALITATIVE) (QUALITATIVE-HEALTH-RESEARCH) (QUALITATIVE-RESEARCH-METHODS) (QUALITATIVE)</p> | 173 |
| Caredata               | <p>Search terms: Growth (infant growth) (baby growth) (infant size) (baby size) (failure to thrive) (faltering growth) (big) (fat) (thin) (small)</p> <p>(toddlers) (baby or babies) (infant or infants)</p>                                                                                                                                                                                                                                                                                                                                                                                                                                                                                                                                                                                                                                                                                                                                                                                                                                                                                                                                                                                                                                                                                                                                                                         | 33  |

|                 |                                                                                                                                                                                                                                                                                                                                                                                                                                                                                                                                                                                                                                                                                                                                                                                                                                                                                                                                                                                                                        |    |
|-----------------|------------------------------------------------------------------------------------------------------------------------------------------------------------------------------------------------------------------------------------------------------------------------------------------------------------------------------------------------------------------------------------------------------------------------------------------------------------------------------------------------------------------------------------------------------------------------------------------------------------------------------------------------------------------------------------------------------------------------------------------------------------------------------------------------------------------------------------------------------------------------------------------------------------------------------------------------------------------------------------------------------------------------|----|
| ChildData       | keywords (GROWTH/"BIRTH WEIGHT") OR Childdata keywords ("FAILURE TO THRIVE") OR Text Words (BABY/INFANT and WEIGHT/HEIGHT/SIZE/BMI/BODY-IMAGE/BODY-SHAPE) AND Childdata keywords (ATTITUDES/"FOCUS GROUPS"/INTERVIEWING/"CROSS CULTURAL STUDIES"/"SOCIAL RESEARCH")                                                                                                                                                                                                                                                                                                                                                                                                                                                                                                                                                                                                                                                                                                                                                    | 0  |
| Index to Theses | ((@Ti (baby or babies or baby's or infant or infants or infancy or infant's or toddler or toddlers or neonate or neonates or neonatal or perinatal) and @Ti size or weight or height or "body mass" or bmi or skinfold or "skin fold" or "head circumference") or @Ti "faltering growth" or "failure to thrive" or "fat baby" or "fat babies" or "fat infants" or "fat infant" or "thin baby" or "thin babies" or "thin infants" or "thin infant" or "small baby" or "small babies" or "small infants" or "small infant" or "large baby" or "large babies" or "large infant" or "large infants" or "little baby" or "little babies" or "little infant" or "little infants") and @Ti ("qualitative research" or "qualitative methods" or "qualitative methodology" or "qualitative methodologies" or "focus group" or "focus groups" or "discussion group" or "discussion groups" or "group discussion" or "group discussions" or "interview" or "interviews" or "interviewed" or "narration" or "narrative research")) | 31 |
